# Supplementary material for: Toward ultrasensitive and fast colorimetric detection of indoor formaldehyde across the visible region using cetyltrimethylammonium chloride-capped bone-shaped gold nanorods as “chromophores”
Source: Royal Society of Chemistry journal article supplement (doi:10.1039/c9an00694j), 2019-01-01
Supplement: c9an00694j1.pdf [file c9an00694j1.pdf]

**Electronic Supplementary Information For**

**Toward ultrasensitive and fast colorimetric detection of indoor formaldehyde across the visible region using cetyltrimethylammonium chloride-capped bone-shaped gold nanorods as “chromophores”**

*Wei Duan,<sup>a</sup> Ao Liu,<sup>a</sup> Qing Li,<sup>a</sup> Zhiwei Li,<sup>c</sup> Cong-ying Wen,<sup>a</sup> Zhixiong Cai,<sup>d</sup> Shiming Tang,<sup>a</sup> Xiyu Li<sup>a</sup> and Jingbin Zeng<sup>\*ab</sup>*

<sup>a</sup> College of Science, China University of Petroleum (East China), Qingdao 266580, China

<sup>b</sup> State Key Laboratory of Chemo/Biosensing and Chemometrics, Hunan University, Changsha 410082, China

<sup>c</sup> Department of Chemistry, University of California, Riverside, USA, 92521.

<sup>d</sup> School of Chemistry and Environmental, Fujian Province University Key Laboratory of Analytical Science, Minnan Normal University, Zhangzhou 363000, China.

\*Corresponding Author

E-mail: xmuzjb@163.com, zengjb@upc.edu.cn (J.Zeng)

**Table of contents**

S1. Photograph of the setup for air sample collection

S2. UV-vis spectra of the bone-shaped Au NRs capped with CTAB and CTAC.

S3. A typical TEM image and UV-vis absorption spectra of routine Au NRs.

S4. Photograph (a) of routine Au NRs-Tollens reagent mixture after incubation with different concentration of HCHO.

S.1

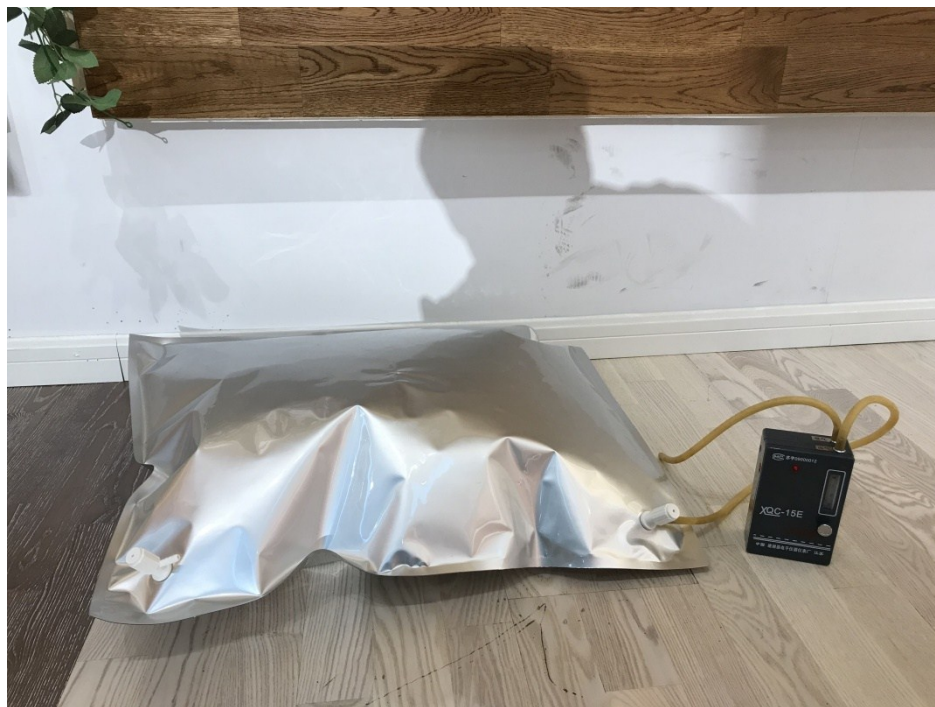

**Figure S1.** Photograph of the setup for air sample collection.

S.2

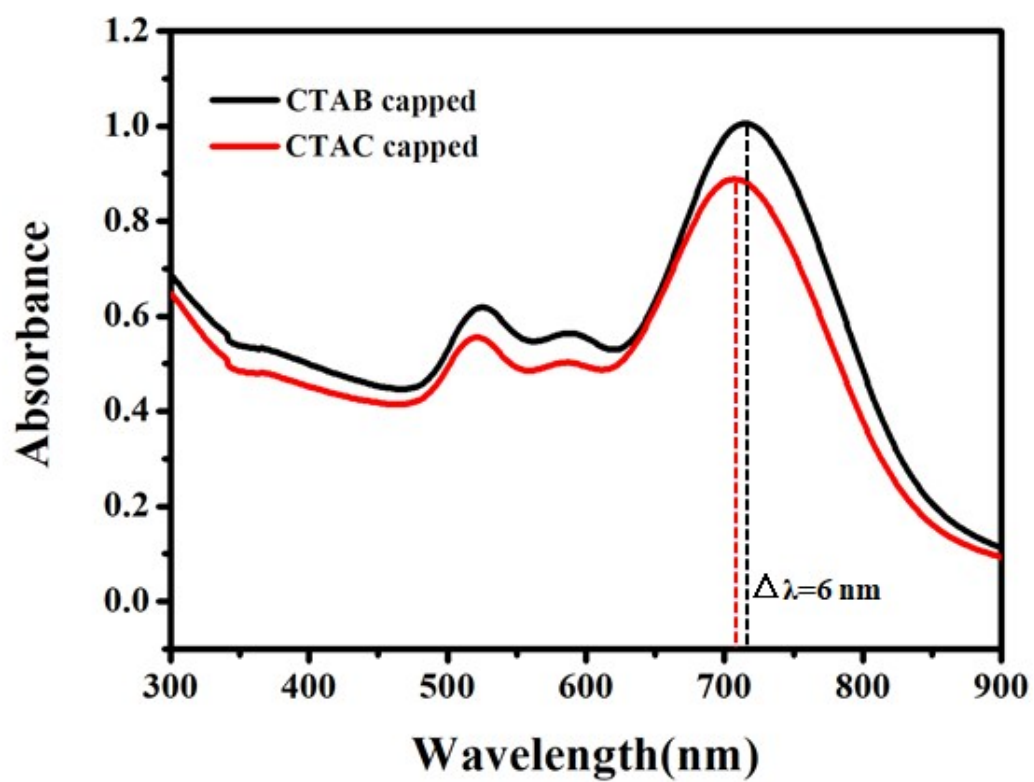

**Figure S2.** UV-vis spectra of the bone-shaped Au NRs capped with CTAB and CTAC.

S.3

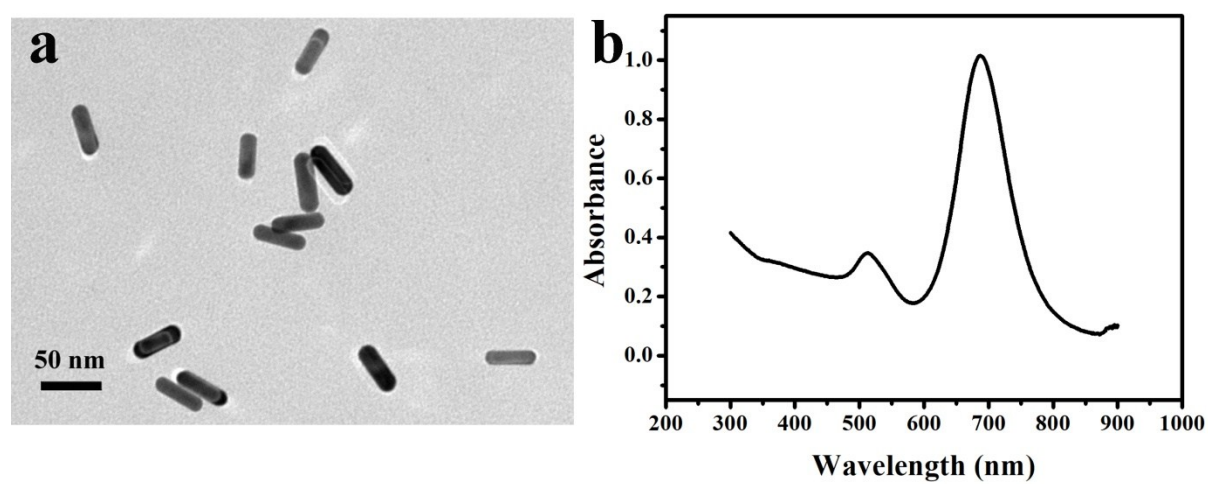

**Figure S3.** A typical TEM image and UV-vis absorption spectra of routine Au NRs.

S.4

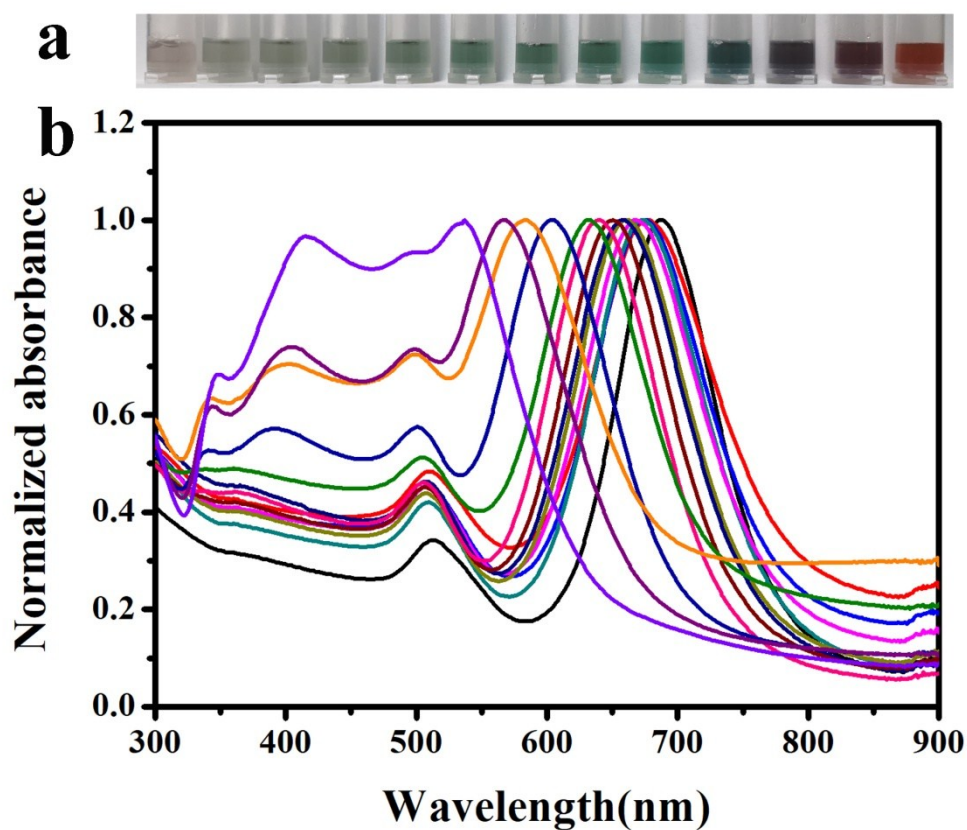

**Figure S4.** Photograph (a) of routine Au NRs-Tollens reagent mixture after incubation with different concentration of HCHO. (From left to right: the concentration of HCHO are 0, 0.1, 0.2, 0.5, 1, 2.5, 7.5, 15, 25, 30, 40, 50, 75  $\mu\text{M}$ ) and their corresponding UV-vis spectrum (from right to left).
